# Supplementary material
Source: Springer Nature journal article supplement (https://www.springermedizin.de/resource/supplementary/12877_2013_976_MOESM2_ESM.docx/9440844)
Supplement: MOESM2 [file 9440844]

**Table 2: Explanatory variables for ADL functional capacity**

| **VARIABLES**  **(N = 281)** | | **Crude OR** | **95%**  **Confidence Interval** | **Adjusted OR** | **95%**  **Confidence Interval** |
| --- | --- | --- | --- | --- | --- |
| **Socio-demographic** |  |  |  |  |  |
| Age Group | 60 to 69 years | 0.36 | (0.24 – 0.52) | 0.19 | (0.06 – 0.66) |
| 70 to 79 years | 0.56 | (0.40 – 0.78) | 0.19 | (0.06 – 0.60) |
| 80 and over | 1.00 | - | 1.00 | - |
| **Health Conditions and Lifestyle** |  |  |  |  |  |
| Has a physician ever told you that you had an embolism, cerebral ischemia or thrombosis? | Yes | 3.62 | (2.21 – 5.93) | 4.39 | (1.25 – 15.40) |
| No | 1.00 | - | 1.00 | - |
| **Mobility Assessment** |  |  |  |  |  |
| What is the level of difficulty for walking 400 meters? | Impossible/Very Difficult | 15.50 | (10.69 – 22.62) | 7.52 | (2.21 – 25.61) |
| Moderate Difficulty | 3.03 | (1.76 – 5.19) | 6.56 | (2.10 – 20.69) |
| Little Difficulty/None | 1.00 | - | 1.00 | - |
| **Cognitive Aspects** |  |  |  |  |  |
| Temporal Orientation | 0 and 1 | 3.70 | (2.30 – 5,.5) | 4.41 | (1.46 – 13.38) |
| 2 and 3 | 2.40 | (1.43 – 4.02) | 1.21 | (0.38 – 3.82) |
| 4 and 5 | 1.00 | - | 1.00 | - |
| Reading | Yes | 1.00 | - | 1.00 | - |
| No | 1.49 | (1.01 – 2.20) | 0.22 | (0.07 – 0.63) |
| **Emotional Aspects** |  |  |  |  |  |
| Have you been upset lately? | Yes | 1.00 | - | 1.00 | - |
| No | 0.67 | (0.46 – 0.99) | 0.21 | (0.06 – 0.70) |
